# Supplementary material
Source: MDPI journal article supplement (https://www.mdpi.com/2304-6767/12/4/89)
Supplement: s1 [file s1]

**Supplementary Table S1.** Laboratory tests and the reference values.

| Laboratory tests                           | Reference values                                           |
|--------------------------------------------|------------------------------------------------------------|
| <b>Complete blood count (CBC)</b>          |                                                            |
| Erythrocytes ( $\times 10^6/\text{mm}^3$ ) | M: 4.5 - 6.5 / F: 3.9 – 5.6                                |
| Hemoglobin (g/dL)                          | M: 13.5 - 17.5 / F: 11.5 – 15.5                            |
| Hematocrit (%)                             | M: 40 – 52 / F: 36 – 48                                    |
| MCV (fL)                                   | 80 – 95                                                    |
| MCH (pg)                                   | 27 – 34                                                    |
| MCHC (g/dL)                                | 30 – 35                                                    |
| RDW-CV (%)                                 | M: 11.6 - 14.4 / F: 11.7 – 14.4                            |
| RDW-SD (fL)                                | M: 35.1- 43.9 / F: 36.4 – 46.3                             |
| Erythroblasts (%)                          | 0                                                          |
| Platelets ( $\times 10^3/\text{mm}^3$ )    | 150 – 400                                                  |
| MPV (fL)                                   | 9.4 - 12.4                                                 |
| Leukocytes ( $10^3/\text{mm}^3$ )          | 4 – 11                                                     |
| Neutrophils ( $10^3/\text{mm}^3$ )         | 2.5 – 7.5                                                  |
| Eosinophil ( $10^3/\text{mm}^3$ )          | 0.04 – 0.44                                                |
| Basophil ( $10^3/\text{mm}^3$ )            | 0.00 – 0.1                                                 |
| Lymphocytes ( $10^3/\text{mm}^3$ )         | 1.5 – 3.5                                                  |
| Monocytes ( $10^3/\text{mm}^3$ )           | 0.2 – 0.8                                                  |
| <b>Basic electrolyte panel</b>             |                                                            |
| Sodium (mEq/L)                             | 135 – 145                                                  |
| Potassium (mEq/L)                          | 3.5 – 5                                                    |
| Magnesium (mg/dL)                          | 1.58 – 2.55                                                |
| Chloride (mEq/L)                           | 98 – 107                                                   |
| Iron (ug/dL)                               | M: 65 – 175 / F: 50 – 170                                  |
| Creatinine (mg/dL)                         | M: 0.7 – 1.2 / F: 0.5 – 0.9                                |
| Glucose (mg/dL)                            | 70 – 99                                                    |
| Urea (mg/dL)                               | 10 - 50                                                    |
| <b>Metabolic panel</b>                     |                                                            |
| Calcium (mg/dL)                            | 12 - 60 years : 8.40 - 10.20 / 61 - 90 years: 8.60 - 10.20 |
| Bilirubin total (mg/dL)                    | 0.2 - 1.0                                                  |
| Bilirubin direct (mg/dL)                   | < 0.3                                                      |
| Bilirubin indirect (mg/dL)                 | 0.10 - 0.60                                                |
| Alkaline phosphatase (U/L)                 | M: 40 - 129 / F: 35 - 104                                  |
| Aspartate aminotransferase (U/L)           | M: < 37 / F: < 31                                          |

|                                                                                                                                                                                                                                                                                   |                                                                                                                       |
|-----------------------------------------------------------------------------------------------------------------------------------------------------------------------------------------------------------------------------------------------------------------------------------|-----------------------------------------------------------------------------------------------------------------------|
| Gamma-glutamyl transferase (U/L)                                                                                                                                                                                                                                                  | M: 8 - 61 / F: 5 - 36                                                                                                 |
| Alanine aminotransferase (U/L)                                                                                                                                                                                                                                                    | M: < 41 / F: < 31                                                                                                     |
| <b>Lipid panel</b>                                                                                                                                                                                                                                                                |                                                                                                                       |
| Total cholesterol (mg/dL)                                                                                                                                                                                                                                                         | < 190                                                                                                                 |
| High-density lipoprotein (HDL) (mg/dL)                                                                                                                                                                                                                                            | > 40                                                                                                                  |
| Low-density lipoprotein (LDL) (mg/dL)                                                                                                                                                                                                                                             | Optimal: < 100, Near/ above optimal: 100 - 129,<br>Borderline High: 130 - 159, High 160 – 189, and Very<br>high > 190 |
| Non-high-density lipoprotein (non-HDL)<br>cholesterol (mg/dL)                                                                                                                                                                                                                     | Optimal: < 130, Acceptable: 130 – 159; High: 160 –<br>189, Very high: > 190                                           |
| VLDL (very-low-density lipoprotein) (mg/dL)                                                                                                                                                                                                                                       | < 35                                                                                                                  |
| Triglycerides (mg/dL)                                                                                                                                                                                                                                                             | < 150                                                                                                                 |
| <b>Thyroid function</b>                                                                                                                                                                                                                                                           |                                                                                                                       |
| Thyroid stimulating hormone (TSH) (ul/mL)                                                                                                                                                                                                                                         | 0.27 – 4.20                                                                                                           |
| Total triiodothyronine (T3) (ng/dL)                                                                                                                                                                                                                                               | 80 – 200                                                                                                              |
| Thyroxine (T4) (ug/dL)                                                                                                                                                                                                                                                            | 5.1 - 14.1                                                                                                            |
| Free thyroxine (free T4) (ng/dL)                                                                                                                                                                                                                                                  | 0.93 - 1.7                                                                                                            |
| <b>Glycated hemoglobin (Hemoglobin A1C) (%)</b>                                                                                                                                                                                                                                   | 4.1 – 6                                                                                                               |
| <b>Coagulation assay</b>                                                                                                                                                                                                                                                          |                                                                                                                       |
| Prothrombin time (PT) (s)                                                                                                                                                                                                                                                         | 10.3 - 16.6                                                                                                           |
| International Normalized Ratio (INR) (s)                                                                                                                                                                                                                                          | 0.95 - 1.20                                                                                                           |
| Activated partial thromboplastin time (aPTT)<br>(s)                                                                                                                                                                                                                               | 25.4 - 36.9                                                                                                           |
| 25-Hydroxy Vitamin D (ng/mL)                                                                                                                                                                                                                                                      | < 60 years old: >20 / > 60 years old: 30 - 60                                                                         |
| HBsAg (Hepatitis B surface antigen)                                                                                                                                                                                                                                               | reactive or not reactive                                                                                              |
| Anti-HBs (Hepatitis B surface antibody)                                                                                                                                                                                                                                           | reactive or not reactive                                                                                              |
| Anti-HBc (Hepatitis B core antibody)                                                                                                                                                                                                                                              | reactive or not reactive                                                                                              |
| Hepatitis C                                                                                                                                                                                                                                                                       | reactive or not reactive                                                                                              |
| HIV                                                                                                                                                                                                                                                                               | reactive or not reactive                                                                                              |
| Syphilis                                                                                                                                                                                                                                                                          | reactive or not reactive                                                                                              |
| C-reactive protein (CRP) (mg/L)                                                                                                                                                                                                                                                   | <5.0 mg/L                                                                                                             |
| Abbreviations: MCV - mean corpuscular volume; MCH - mean corpuscular hemoglobin;<br>MCHC - mean corpuscular hemoglobin concentration; RDW - Erythrocyte Distribution Width;<br>RDW-SD - Erythrocyte Distribution Width (standard deviation); MPV - mean platelet volume<br>(MPV). |                                                                                                                       |

**Supplementary Table S2.** List of the comorbidities reported by the included patients (n = 110).

| <b>Diagnosis</b>            | <b>Value n (%)</b> |
|-----------------------------|--------------------|
| Hypertension                | 36 (51.4)          |
| Dyslipidemia                | 16 (22.9)          |
| Diabetes                    | 11 (15.7)          |
| Gastritis                   | 9 (12.9)           |
| HIV                         | 5 (7.1)            |
| Previous cancer             | 5 (7.1)            |
| Acute myocardial infarction | 5 (7.1)            |
| Tuberculosis (treated)      | 5 (7.1)            |
| Obesity                     | 5 (7.1)            |
| Asthma                      | 3 (4.3)            |
| Gout                        | 3 (4.3)            |
| Hypothyroidism              | 3 (4.3)            |
| Impaired vision             | 3 (4.3)            |
| Syphilis                    | 3 (4.3)            |
| Anxiety                     | 2 (2.9)            |
| Arrhythmia                  | 2 (2.9)            |
| Stroke                      | 2 (2.9)            |
| Bronchitis                  | 2 (2.9)            |
| Hepatic steatosis           | 2 (2.9)            |
| Congestive heart failure    | 2 (2.9)            |
| Prediabetes                 | 2 (2.9)            |
| Osteoporosis                | 2 (2.9)            |
| Hepatitis C                 | 2 (2.9)            |
| Leg paresthesia             | 2 (2.9)            |
| Arthritis                   | 1 (1.4)            |
| Chron disease               | 1 (1.4)            |
| Coronary artery disease     | 1 (1.4)            |
| Depression                  | 1 (1.4)            |
| Dyspepsia                   | 1 (1.4)            |
| Pulmonary emphysema         | 1 (1.4)            |
| Migraine                    | 1 (1.4)            |
| Esophagitis                 | 1 (1.4)            |
| Glaucoma                    | 1 (1.4)            |
| Hemiparesis left            | 1 (1.4)            |
| Hepatitis B                 | 1 (1.4)            |
| Spinal disc herniation      | 1 (1.4)            |
| Parkinson investigation     | 1 (1.4)            |

|                              |         |
|------------------------------|---------|
| Labyrinthitis                | 1 (1.4) |
| Osteoarthritis               | 1 (1.4) |
| Osteopenia                   | 1 (1.4) |
| Hearing loss                 | 1 (1.4) |
| Mitral valve prolapse        | 1 (1.4) |
| Gastroesophageal reflux      | 1 (1.4) |
| Poliomyelitis sequelae (leg) | 1 (1.4) |

Abbreviations: no., total number of patients; %, percentage.

**Supplementary Table S3.** Medication in use data and the most used medication categories.

| Medication in use                 | Value n (%) |
|-----------------------------------|-------------|
| Yes                               | 51 (46.4)   |
| More than one medication category | 26 (51)     |
| Most used medication categories   |             |
| Antihypertensive                  | 29 (56.9)   |
| Diuretics                         | 13 (25.5)   |
| Lipid-lowering agents             | 11 (21.6)   |
| Antidiabetic/ Hypoglycemic agents | 11 (21.6)   |
| Proton pump inhibitors            | 7 (13.7)    |
| Antiretroviral                    | 5 (9.8)     |
| Antidepressants                   | 3 (5.9)     |
| Gamma aminobutyric acid analogs   | 3 (5.9)     |
| Laxatives                         | 3 (5.9)     |

Abbreviations: n: number of patients; %: percentage.

**Supplementary Table S4.** OHIP-14 questionnaire, mean score and standard deviation per answer, and mean total, range and standard deviation.

| OHIP-14                            |                                             |              |
|------------------------------------|---------------------------------------------|--------------|
| Domain                             | Item                                        | Mean (STDEV) |
| Domain 1: Functional               | 1. Had trouble pronouncing any words?       | 1.41 (1.71)  |
|                                    | 2. Felt sense of taste has worsened?        | 0.85 (1.49)  |
| Domain 2: Physical pain            | 3. Had painful aching?                      | 2.16 (1.69)  |
|                                    | 4. Found it uncomfortable to eat any foods? | 2.21 (1.86)  |
| Domain 3: Psychological discomfort | 5. Been self-conscious                      | 2.29 (1.63)  |

|                                    |                                      |             |
|------------------------------------|--------------------------------------|-------------|
|                                    | 6. Felt tense                        | 1.31 (1.56) |
| Domain 4: Physical disability      | 7. Felt diet has been unsatisfactory | 2.31 (1.85) |
|                                    | 8. Had to interrupt meals            | 1.03 (1.43) |
| Domain 5: Psychological disability | 9. Found it difficult to relax       | 1.36 (1.66) |
|                                    | 10. Been a bit embarrassed           | 0.57 (1.11) |
| Domain 6: Social disability        | 11. Been a bit irritable             | 0.59 (1.03) |
|                                    | 12. Had difficulty doing usual jobs  | 1.27 (1.64) |
| Domain 7: Handicap                 | 13. Felt life less satisfying        | 1.62 (1.64) |
|                                    | 14. Been totally unable to function  | 0.52 (1.16) |
|                                    | TOTAL (sum)                          | 19.5 (12.5) |
|                                    | Range                                | 0 - 49      |

---

Abbreviations: OHIP-14 - The Oral Health Impact Profile.
